# Supplementary material for: NaCl salt stress and PEG water stress differentially affect germination and early seedling growth of two sesame (Sesamum indicum L.) cultivars
Source: Research Square preprint supplement (doi:10.21203/rs.3.rs-4537898/v1), 2024-07-11
Supplement: Supplementary file 1 [file 863535e141428c9534711487.docx]

**Table 1** Seed morphological characteristics of cultivars Sohag 1 (Sohg) and Shandaweel 3 (Shnd) of sesame. Each value is the mean of three replicates ± SE. Means with common letters are non-significantly different at P≤0.05

| Cultivar | Seed length (mm) | Seed width (mm) | Seed width/length ratio | Seed volume (mm3) | Seed index (g/1000 seed) | Seed density (g/cm3) | Seed color |
| --- | --- | --- | --- | --- | --- | --- | --- |
| Sohg | 3.50 ± 0.06a | 1.83 ± 0.02a | 0.52 ± 0.01a | 3.00 ± 0.06a | 3.30 ± 0.05a | 1.10 ± 0.16a | Red |
| Shnd | 3.10 ± 0.03b | 1.87 ± 0.03ab | 0.60 ± 0.01b | 2.00 ± 0.11b | 2.65 ± 0.02b | 1.33 ± 0.01b | White |
