# Supplementary material for: NaCl salt stress and PEG water stress differentially affect germination and early seedling growth of two sesame (Sesamum indicum L.) cultivars
Source: Research Square preprint supplement (doi:10.21203/rs.3.rs-4537898/v1), 2024-07-11
Supplement: Supplementary file 2 [file 86c06ca2dc6d0339f61da0c8.docx]

**Table 5** Seedling growth during recovery of seeds of Sohg and Shnd cultivars of sesame from salt stress and water stress. Each value is the mean of three replicates ± SE. Means with common letters are non-significantly different at P≤0.05

| Cultivar and stress pretreatment | Seedling FW (mg/seedling) | Radicle length (cm) | Seedling DW (mg/seedling) | Seedling water content (% FW) |
| --- | --- | --- | --- | --- |
| Sohg |  |  |  |  |
| -0.615 MPa NaCl | 30.4 ± 1.37a | 1.03 ± 0.09a | 3.07 ± 0.10a | 89.9 ± 0.46a |
| -0.410 MPa PEG | 23.2 ± 1.97bc | 1.00 ± 0.11a | 2.78 ± 0.24a | 87.9 ± 1.40ab |
| -0.615 MPa PEG | 25.9 ± 1.55ab | 1.17 ± 0.03a | 2.91 ± 0.16a | 88.8 ± 0.10ab |
| Shnd |  |  |  |  |
| -0.615 MPa NaCl | 24.1 ± 1.01bc | 1.03 ± 0.09a | 3.02 ± 0.02a | 87.4 ± 0.49b |
| -0.410 MPa PEG | 20.5 ± 2.02c | 1.00 ± 0.11a | 2.72 ± 0.34a | 86.8 ± 0.84b |
| -0.615 MPa PEG | 27.2 ± 0.87ab | 1.17 ± 0.03a | 3.04 ± 0.16a | 88.8 ± 0.24ab |
