# Supplementary material for: NaCl salt stress and PEG water stress differentially affect germination and early seedling growth of two sesame (Sesamum indicum L.) cultivars
Source: Research Square preprint supplement (doi:10.21203/rs.3.rs-4537898/v1), 2024-07-11
Supplement: Supplementary file 3 [file a30d1c90c5614e59650fb792.docx]

**Table 3** Three-way ANOVA showing the effect of themain factors: sesamecultivar (Cv.), type of osmoticum (Osm.) and osmotic potential of the bathing solution (MPa) and their interactions on growth and mineral composition of sesame seedlings

| **Variable and**  **source of variation** | **df** | **F** | **P** |  | **Variable and**  **source of variation** | **df** | **F** | **P** |
| --- | --- | --- | --- | --- | --- | --- | --- | --- |
| **Seedling FW** | | | |  | **Seedling K+ concentration** | | | |
| Cv. | 1 | 0.031 | 0.862 |  | Cv. | 1 | 1.861 | 0.180 |
| Osm. | 1 | 33.08 | 0.000 |  | Osm. | 1 | 1186 | 0.000 |
| MPa | 4 | 311.5 | 0.000 |  | MPa | 4 | 131.3 | 0.000 |
| Cv. × Osm. | 1 | 5.272 | 0.027 |  | Cv. × Osm. | 1 | 2.240 | 0.142 |
| Cv. × MPa | 4 | 3.566 | 0.014 |  | Cv. × MPa | 4 | 5.031 | 0.002 |
| Osm. × MPa | 4 | 5.849 | 0.001 |  | Osm. × MPa | 4 | 202.2 | 0.000 |
| Cv. × Osm. × MPa | 4 | 2.155 | 0.092 |  | Cv. × Osm. × MPa | 4 | 3.222 | 0.022 |
| **Seedling DW** | | | |  | **Seedling Na+ concentration** | | | |
| Cv. | 1 | 8.968 | 0.005 |  | Cv. | 1 | 28.92 | 0.000 |
| Osm. | 1 | 105.5 | 0.000 |  | Osm. | 1 | 1540 | 0.000 |
| MPa | 4 | 2.431 | 0.063 |  | MPa | 4 | 136.2 | 0.000 |
| Cv. × Osm. | 1 | 0.796 | 0.378 |  | Cv. × Osm. | 1 | 36.91 | 0.000 |
| Cv. × MPa | 4 | 2.569 | 0.053 |  | Cv. × MPa | 4 | 9.282 | 0.000 |
| Osm. × MPa | 4 | 7.711 | 0.000 |  | Osm. × MPa | 4 | 128.2 | 0.000 |
| Cv. × Osm. × MPa | 4 | 1.758 | 0.156 |  | Cv. × Osm. × MPa | 4 | 4.650 | 0.004 |
| **Seedling water content** | | | |  | **Seedling K+/Na+ ratio** | | | |
| Cv. | 1 | 10.32 | 0.003 |  | Cv. | 1 | 1.563 | 0.218 |
| Osm. | 1 | 19.85 | 0.000 |  | Osm. | 1 | 1866 | 0.000 |
| MPa | 4 | 1517 | 0.000 |  | MPa | 4 | 90.85 | 0.000 |
| Cv. × Osm. | 1 | 0.691 | 0.411 |  | Cv. × Osm. | 1 | 1.276 | 0.265 |
| Cv. × MPa | 4 | 7.364 | 0.000 |  | Cv. × MPa | 4 | 3.526 | 0.015 |
| Osm. × MPa | 4 | 172.3 | 0.000 |  | Osm. × MPa | 4 | 206.7 | 0.000 |
| Cv. × Osm. × MPa | 4 | 2.854 | 0.036 |  | Cv. × Osm. × MPa | 4 | 2.460 | 0.061 |
| **Radicle length** | | | |  |  |  |  |  |
| Cv. | 1 | 6.269 | 0.016 |  |  |  |  |  |
| Osm. | 1 | 385.8 | 0.000 |  |  |  |  |  |
| MPa | 4 | 138.5 | 0.000 |  |  |  |  |  |
| Cv. × Osm. | 1 | 0.895 | 0.350 |  |  |  |  |  |
| Cv. × MPa | 4 | 41.02 | 0.000 |  |  |  |  |  |
| Osm. × MPa | 4 | 37.80 | 0.000 |  |  |  |  |  |
| Cv. × Osm. × MPa | 4 | 11.56 | 0.000 |  |  |  |  |  |
