# Supplementary material for: NaCl salt stress and PEG water stress differentially affect germination and early seedling growth of two sesame (Sesamum indicum L.) cultivars
Source: Research Square preprint supplement (doi:10.21203/rs.3.rs-4537898/v1), 2024-07-11
Supplement: Supplementary file 4 [file ded193038d50093b7fa39317.docx]

**Table 4** Indices of germination recovery from salt stress and water stress of seeds of cultivars Sohg and Shnd of sesame. Each value is the mean of three replicates ± SE. Means with common letters are non-significantly different at P≤0.05

| Cultivar and  stress pretreatment | Final recovery % | MGT (day) | WMGR  (day-1) | CUG (day-2) | (bit) |
| --- | --- | --- | --- | --- | --- |
| Sohg |  |  |  |  |  |
| -0.615 MPa NaCl | 92.3 ± 3.4a | 1.75 ± 0.11a | 0.577 ± 0.04a | 1.52 ± 0.18a | 1.47 ± 0.10a |
| -0.410 MPa PEG | 100.0 ± 0.0c | 1.33 ± 0.06b | 0.752 ± 0.03b | 2.78 ± 0.38a | 1.03 ± 0.10b |
| -0.615 MPa PEG | 99.1 ± 0.9bc | 1.27 ± 0.05b | 0.787 ± 0.03b | 4.81 ± 1.01b | 0.88 ± 0.11b |
| Shnd |  |  |  |  |  |
| -0.615 MPa NaCl | 94.2 ± 0.7ab | 1.59 ± 0.08a | 0.632 ± 0.03a | 1.54 ± 0.17a | 1.42 ± 0.10a |
| -0.410 MPa PEG | 93.0 ± 4.1ab | 1.81 ± 0.12a | 0.557 ± 0.04a | 2.17 ± 0.36a | 1.42 ± 0.08a |
| -0.615 MPa PEG | 98.9 ± 1.1bc | 1.76 ± 0.02a | 0.569 ± 0.01a | 2.33 ± 0.30a | 1.39 ± 0.06a |
