# Supplementary material for: NaCl salt stress and PEG water stress differentially affect germination and early seedling growth of two sesame (Sesamum indicum L.) cultivars
Source: Research Square preprint supplement (doi:10.21203/rs.3.rs-4537898/v1), 2024-07-11
Supplement: Supplementary file 5 [file fc7b237e1d88215f75616570.docx]

**Table 2** Three-way ANOVA showing the effect of themain factors: sesamecultivar (Cv.), type of osmoticum (Osm.) and osmotic potential of the bathing solution (MPa) and their interactions on parameters of seed germination

| **Variable and**  **source of variation** | **df** | **F** | **P** |  | **Variable and**  **source of variation** | **df** | **F** | **P** |
| --- | --- | --- | --- | --- | --- | --- | --- | --- |
| **Final germination (degree)** | | | |  | **Coefficient of variation of germination time (CVt)** | | | |
| Cv. | 1 | 2.594 | 0.115 |  | Cv. | 1 | 30.71 | 0.000 |
| Osm. | 1 | 18.77 | 0.000 |  | Osm. | 1 | 0.006 | 0.939 |
| MPa | 4 | 77.14 | 0.000 |  | MPa | 4 | 61.42 | 0.000 |
| Cv. × Osm. | 1 | 0.497 | 0.485 |  | Cv. × Osm. | 1 | 1.766 | 0.191 |
| Cv. × MPa | 4 | 2.298 | 0.076 |  | Cv. × MPa | 4 | 9.754 | 0.000 |
| Osm. × MPa | 4 | 1.662 | 0.178 |  | Osm. × MPa | 4 | 41.54 | 0.000 |
| Cv. × Osm. × MPa | 4 | 0.368 | 0.830 |  | Cv. × Osm. × MPa | 4 | 1.857 | 0.137 |
|  |  |  |  |  |  |  |  |  |
| **Timson index of germination velocity** | | | |  | **Coefficient of uniformity of germination (CUG)** | | | |
| Cv. | 1 | 26.03 | 0.000 |  | Cv. | 1 | 138.4 | 0.000 |
| Osm. | 1 | 113.4 | 0.000 |  | Osm. | 1 | 29.57 | 0.000 |
| MPa | 4 | 511.0 | 0.000 |  | MPa | 4 | 465.0 | 0.000 |
| Cv. × Osm. | 1 | 3.000 | 0.091 |  | Cv. × Osm. | 1 | 0.004 | 0.949 |
| Cv. × MPa | 4 | 0.192 | 0.941 |  | Cv. × MPa | 4 | 42.88 | 0.000 |
| Osm. × MPa | 4 | 9.184 | 0.000 |  | Osm. × MPa | 4 | 28.68 | 0.000 |
| Cv. × Osm. × MPa | 4 | 1.655 | .180 |  | Cv. × Osm. × MPa | 4 | 0.565 | 0.689 |
|  |  |  |  |  |  |  |  |  |
| **Weighted mean germination rate (WMGR)** | | | |  | **Synchronization index ()** | | | |
| Cv. | 1 | 108.97 | 0.000 |  | Cv. | 1 | 38.9 | 0.000 |
| Osm. | 1 | 212.8 | 0.000 |  | Osm. | 1 | 4.45 | 0.041 |
| MPa | 4 | 1337 | 0.000 |  | MPa | 4 | 120.4 | 0.000 |
| Cv. × Osm. | 1 | 7.240 | 0.010 |  | Cv. × Osm. | 1 | 1.30 | 0.260 |
| Cv. × MPa | 4 | 11.95 | 0.000 |  | Cv. × MPa | 4 | 2.290 | 0.076 |
| Osm. × MPa | 4 | 26.35 | 0.000 |  | Osm. × MPa | 4 | 14.46 | 0.000 |
| Cv. × Osm. × MPa | 4 | 3.567 | 0.014 |  | Cv. × Osm. × MPa | 4 | 1.716 | 0.165 |
